# Supplementary material for: Synthesis and gelation properties of poly(2-alkyl-2-oxazoline) based thermo-gels
Source: Royal Society of Chemistry journal article supplement (doi:10.1039/c6ra06781f), 2016-01-01

## Synthesis and gelation properties of poly(2-alkyl-2-oxazoline) based thermo-gels

Adam L. Fisher<sup>a</sup>, Julia M. H. Schollick<sup>b</sup>, Dirk G. A. L. Aarts<sup>b</sup>, Martin C. Gossel<sup>a\*</sup>

Supporting materials

Example of the rheological measurements at pH 7.

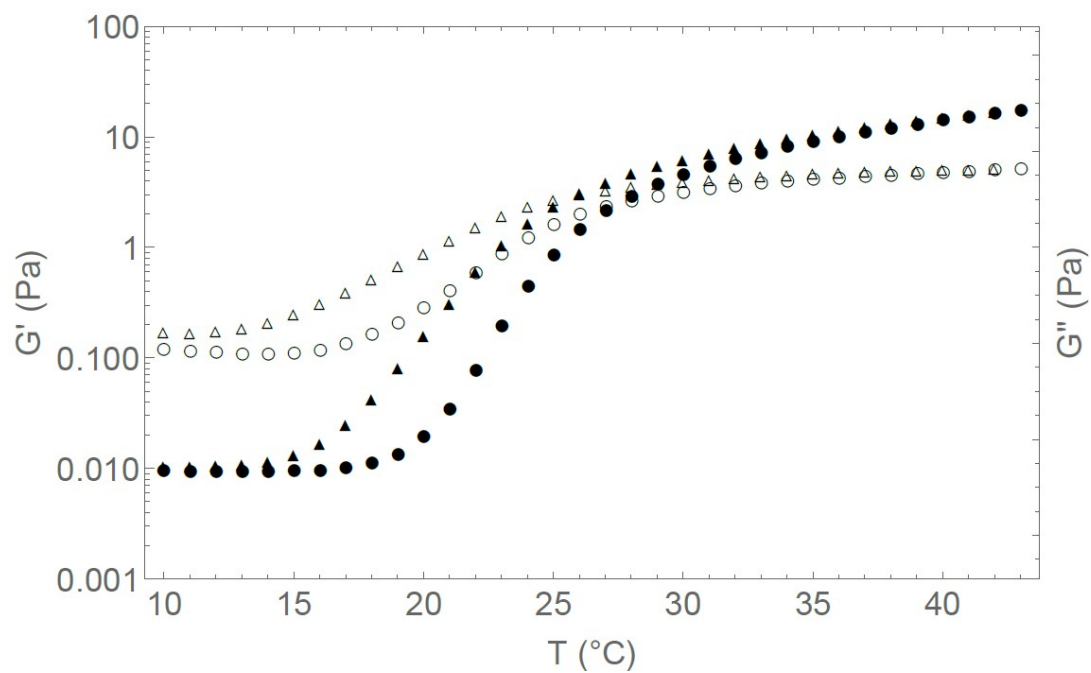

Supplement: c6ra06781f1.pdf [file c6ra06781f1.pdf]
